# Supplementary material
Source: PubMed Central journal article supplement (PMC5313330)
Supplement: NIHMS818709-supplement-Supp_info.pdf [file NIHMS818709-supplement-Supp_info.pdf]

Supporting Information for

**Human and Server Docking Prediction for CAPRI Round  
30-35 Using LZerD with Combined Scoring Functions**

Lenna X. Peterson<sup>†</sup>, Hyungrae Kim<sup>†</sup>, Juan Esquivel-Rodriguez, Amitava Roy,  
Xusi Han, Woong-Hee Shin, Jian Zhang, Genki Terashi, Matt Lee, and Daisuke  
Kihara\*

Proteins (2016)

<sup>†</sup> Co-first authors

\* To whom correspondence should be addressed

E-mail: dkihara@purdue.edu

Table S1: Templates used for single models

| CAPRI | CASP ID | Template(s) used                         | C <sub>α</sub><br>RMSD<br>(Å) | CASP Stage2 server model                         | C <sub>α</sub><br>RMSD<br>(Å) |
|-------|---------|------------------------------------------|-------------------------------|--------------------------------------------------|-------------------------------|
| T69   | T0764   | 1qlw                                     | 7.9                           | -                                                | -                             |
| T72   | T0770   | 3mx3, 3gzs                               | 5.8                           | -                                                | -                             |
| T75   | T0776   | 4jhl                                     | 2.8                           | Zhang-Server_TS1 (3w7vA 4jhlA 3rjtA 1yzfA)       | 2.8                           |
| T79   | T0792   | 3rco                                     | 3.1                           | -                                                | -                             |
| T80   | T0801   | 3a7o                                     | 1.8                           | Baker-Server_TS5 (2fn6A)                         | 1.4                           |
| T82   | T0805   | 3bb8, 3dr4, 2oga                         | 4.6                           | Baker-Server_TS2 (2isjA)                         | 3.2                           |
| T84   | T0811   | 4g1k, 1yya, 1btm, 3gvg, 1b9b             | 1.8                           | Baker-Server_TS2 (4iotA)                         | 1.6                           |
| T85   | T0813   | 3ggoA, 3ggpA, 3ggg_D                     | 4.6                           | Baker-Server_TS4 (3ktdA)                         | 2.3                           |
| T86   | T0815   | 2bng, 4h3u, 2k54A, 3fh1A, 3ff2A          | 2.0                           | Baker-Server_TS1 (3ff2A)                         | 2.4                           |
| T87   | T0819   | 3get, 3ffh, 3hdoA, 3eucA, 1j32A          | 3.7                           | Baker-Server_TS5 (3cq4A)                         | 7.9                           |
| T89   | T0840   | 4fwwA, 2uzxB, 3okyA, 3al9A, 3ol2B        | 7.4                           | Baker-Server_TS3 (3oktA)                         | 8.9                           |
|       | T0841   | 2asuB                                    | 9.3                           | Baker-Server_TS4 (4duuA)                         | 8.7                           |
| T90   | T0843   | 3dr4A, 3bb8A, 3b8xA, 1mdoA, 3ogaA        | 2.6                           | Baker-Server_TS3 (2fnuA)                         | 2.1                           |
| T91   | T0847   | 1byr, 4gel, 1v0w, 3hsi, 2cil             | 5.4/5.5                       | Zhang-Server_TS1 (1byrA 1bysA 4gelA 4ggjA 3hsiA) | 4.1/5.1                       |
| T92   | T0849   | 1m0u, 2on7, 1zl9, 2on5, 2hnl, 1b48, 1yq1 | 9.6/9.7                       | Baker-Server_TS1 (3gtuB)                         | 8.1/7.7                       |
| T93   | T0851   | 3g79, 3gg2, 2gq4, 2y0c                   | 6.4/7.2                       | Baker-Server_TS3 (3g79A)                         | 3.1/3.7                       |
| T94   | T0852   | 3gff, 2qm0, 1elwA, 4cgwA, 3sz7A, 3q49B   | 8.5/8.8                       | Baker-Server_TS1 (3gffB, 1a17A)                  | 10.6/10.8                     |

We did not dock CASP models for T69, T72, and T79.

Table S2: Interface prediction accuracy

| Target  | Merged    |        |      | cons-PPISP |        |      | BindML -1.5 |        |      | BindML -0.5 |        |      |
|---------|-----------|--------|------|------------|--------|------|-------------|--------|------|-------------|--------|------|
|         | Precision | Recall | F1   | Precision  | Recall | F1   | Precision   | Recall | F1   | Precision   | Recall | F1   |
| T69     | 0.59      | 0.29   | 0.39 | 0.85       | 0.25   | 0.39 | 0.45        | 0.13   | 0.20 | 0.40        | 0.43   | 0.41 |
| T72     | 0.05      | 0.08   | 0.06 | 0.06       | 0.04   | 0.05 | 0.04        | 0.04   | 0.04 | 0.11        | 0.32   | 0.16 |
| T75     | 0.00      | 0.00   | -    | 0.00       | 0.00   | -    | 0.00        | 0.00   | -    | 0.00        | 0.00   | -    |
| T79     | 0.48      | 0.55   | 0.51 | 0.52       | 0.55   | 0.54 | 0.33        | 0.05   | 0.09 | 0.39        | 0.45   | 0.42 |
| T80     | 0.83      | 0.56   | 0.67 | 1.00       | 0.38   | 0.56 | 0.68        | 0.25   | 0.37 | 0.58        | 0.77   | 0.66 |
| T82     | 0.71      | 0.30   | 0.42 | 0.69       | 0.25   | 0.37 | 0.77        | 0.13   | 0.22 | 0.81        | 0.38   | 0.51 |
| T84     | 0.92      | 0.55   | 0.69 | 0.95       | 0.45   | 0.61 | 0.92        | 0.29   | 0.44 | 0.57        | 0.60   | 0.58 |
| T85     | 0.97      | 0.28   | 0.44 | 0.95       | 0.18   | 0.30 | 1.00        | 0.20   | 0.33 | 0.86        | 0.51   | 0.64 |
| T86     | 0.21      | 0.67   | 0.32 | 0.23       | 0.56   | 0.32 | 0.14        | 0.11   | 0.13 | 0.15        | 0.44   | 0.22 |
| T87     | 0.71      | 0.24   | 0.36 | 0.85       | 0.19   | 0.31 | 0.61        | 0.12   | 0.20 | 0.58        | 0.49   | 0.53 |
| T89A    | 0.00      | 0.00   | -    | 0.00       | 0.00   | -    | 0.00        | 0.00   | -    | 0.04        | 0.22   | 0.07 |
| T89B    | 0.38      | 0.52   | 0.44 | 0.57       | 0.52   | 0.55 | 0.00        | 0.00   | -    | 0.15        | 0.26   | 0.19 |
| T90     | 0.74      | 0.38   | 0.50 | 0.80       | 0.26   | 0.40 | 0.71        | 0.20   | 0.31 | 0.61        | 0.70   | 0.65 |
| T91     | 0.50      | 0.38   | 0.43 | 0.50       | 0.29   | 0.37 | 0.64        | 0.21   | 0.31 | 0.47        | 0.47   | 0.47 |
| T92     | 0.52      | 0.29   | 0.37 | 0.59       | 0.25   | 0.35 | 0.35        | 0.12   | 0.17 | 0.41        | 0.35   | 0.38 |
| T93     | 0.63      | 0.48   | 0.54 | 0.90       | 0.29   | 0.43 | 0.50        | 0.25   | 0.34 | 0.41        | 0.60   | 0.49 |
| T94     | 0.23      | 0.30   | 0.26 | 0.10       | 0.07   | 0.08 | 0.33        | 0.27   | 0.30 | 0.23        | 0.60   | 0.33 |
| Average | 0.53      | 0.37   | 0.43 | 0.60       | 0.28   | 0.37 | 0.47        | 0.15   | 0.25 | 0.42        | 0.47   | 0.42 |

Merged: performance of the union of cons-PPISP and BindML -1.5 (residues predicted by either or both methods are predicted); BindML -1.5: using residues with a BindML score  $\leq -1.5$ ; BindML -0.5: using residues with a BindML score  $\leq -0.5$ . Precision: (number of true positives)/(number of predicted positives); recall: (number of true positives)/(number of actual positives); F1:  $2 \cdot \text{precision} \cdot \text{recall} / (\text{precision} + \text{recall})$ . Dash (-) indicates that F1-score is not defined because both precision and recall are 0.

Table S3: Weights from logistic regression jackknife

| Test Target | w0            | w1            | w2            | w3           | w4            | w5            |
|-------------|---------------|---------------|---------------|--------------|---------------|---------------|
| T75         | -8.0912938449 | -1.3688033399 | -1.1778600548 | 0.7416239669 | -0.3048333114 | 0.2545596097  |
| T79         | -8.3856541051 | -0.9680873403 | -0.9665509229 | 0.1769041945 | -0.3535433522 | 0.2430590138  |
| T80         | -8.0451115545 | -1.4163465989 | -1.1499677208 | 0.7185715482 | -0.3214804879 | 0.3597015568  |
| T82         | -8.0549823421 | -1.4334898546 | -1.2039798006 | 0.8042730071 | -0.3320483466 | 0.3057084964  |
| T84         | -8.1089437095 | -1.6282930902 | -1.1467776187 | 1.0065735415 | -0.3374461165 | 0.2614221816  |
| T85         | -8.2944007666 | -1.6079657992 | -1.3438787349 | 0.8290172284 | -0.242946187  | 0.2611811393  |
| T86         | -8.0999457755 | -1.4499203121 | -1.1643743389 | 0.7705576998 | -0.3393187931 | 0.3013481081  |
| T87         | -8.0494813094 | -1.4498981529 | -1.1939380594 | 0.8178968052 | -0.3264398359 | 0.2869129142  |
| T89         | -8.3137167824 | -1.4865869155 | -1.2349909885 | 0.7694494879 | -0.4017608443 | 0.3603071605  |
| T90         | -8.0749774294 | -1.4170091338 | -1.1734387315 | 0.6909266437 | -0.3062337066 | 0.3124370648  |
| T91         | -8.2434229598 | -1.3924785603 | -0.9816516829 | 0.8970070256 | -0.3508178207 | -0.0322659103 |
| T92         | -8.1438700968 | -1.435794271  | -1.2643686133 | 0.8484427573 | -0.3558522077 | 0.2885377551  |
| T93         | -8.0805300855 | -1.3676542526 | -1.1930640645 | 0.709531422  | -0.3275865894 | 0.2726405379  |

Each row represents one subsample of the jackknife procedure. For example, in row T75, targets T79-T93 were used as the training set and target T75 was used as the test set. w0 is the intercept and w1-w5 are weights for the Z-scores of DFIRE, GOAP, ITScorePro, OPUS-PSP, and SOAP-PP, respectively.
